# Supplementary material for: Enhanced catalytic activity and stability of copper and nitrogen doped titania nanorod supported Pt electrocatalyst for oxygen reduction reaction in polymer electrolyte fuel cells
Source: Royal Society of Chemistry journal article supplement (doi:10.1039/c7nj03463f), 2017-01-01
Supplement: c7nj03463f1.pdf [file c7nj03463f1.pdf]

## Enhanced catalytic activity and stability of copper and nitrogen doped titania nanorods supported Pt electrocatalyst for oxygen reduction reaction in polymer electrolyte fuel cells

P. Dhanasekaran<sup>a\*</sup>, S. Vinod Selvaganesh<sup>a</sup>, Santoshkumar. D. Bhat<sup>a\*</sup>

<sup>a</sup> CSIR-Central Electrochemical Research Institute (CECRI),-Madras Unit, CSIR- Madras Complex, Chennai-600 113, Tamil Nadu, India.

**Table 1S: Optimization of Rutile TiO<sub>2</sub> during preparation of nanorods**

| Name                     | Temperature | Solution               | Phase formation | Nanostructure        |
|--------------------------|-------------|------------------------|-----------------|----------------------|
| P-25 (TiO <sub>2</sub> ) | 180 °C/ 4h  | 10 M KOH               | Anatase         | Spherical            |
| P-25                     | 180 °C/ 8h  | 10 M KOH               | Anatase         | Spherical+ wires     |
| P-25                     | 180 °C/ 24h | 10 M KOH               | Anatase         | nanowires            |
| Titanium isopropoxide    | 180 °C/24h  | 10 M KOH               | Anatase         | Irregular shape      |
| Titanium isopropoxide    | 180 °C/4h   | 5 M HCl<br>ITO plate   | Rutile          | Spherical + Nanorods |
| Titanium isopropoxide    | 180 °C/6h   | 5 M HCl<br>ITO plate   | Rutile          | Nanorods             |
| Titanium isopropoxide    | 180 °C/6h   | 5 M HCl<br>Glass plate | Rutile          | Nanorods             |

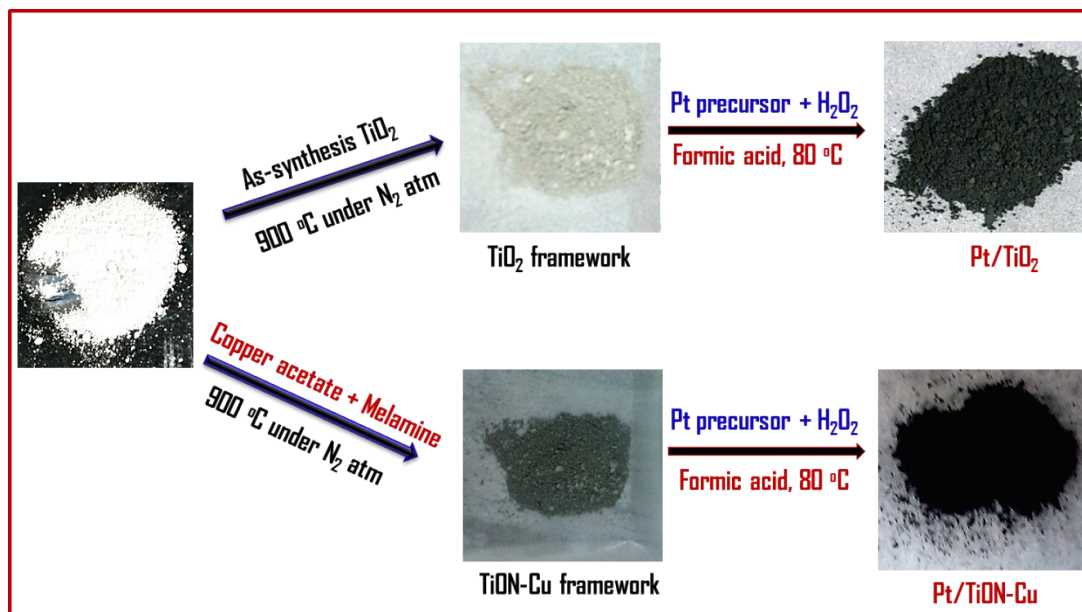

Fig. 1S Various stages of colour change observed during preparation of ORR catalyst.

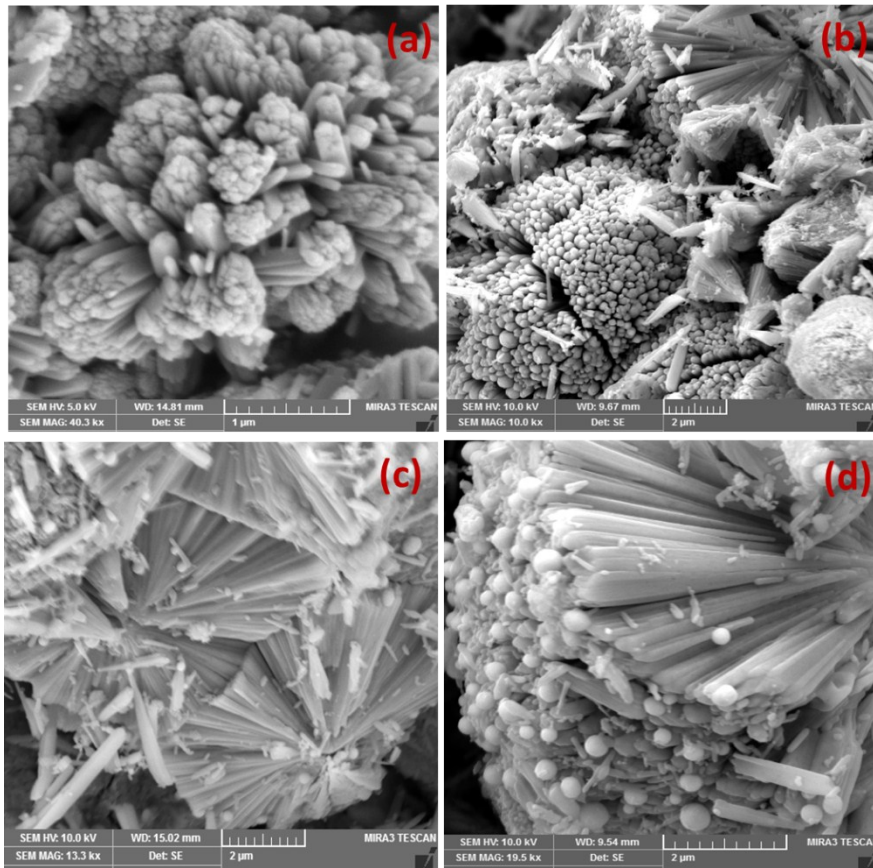

**Fig. 2S** (a) FE-SEM image for (a)  $\text{TiO}_2$ , (b)  $\text{TiON}$ , (c)  $\text{TiON-Cu 1}$  and (d)  $\text{TiON-Cu 3}$ .

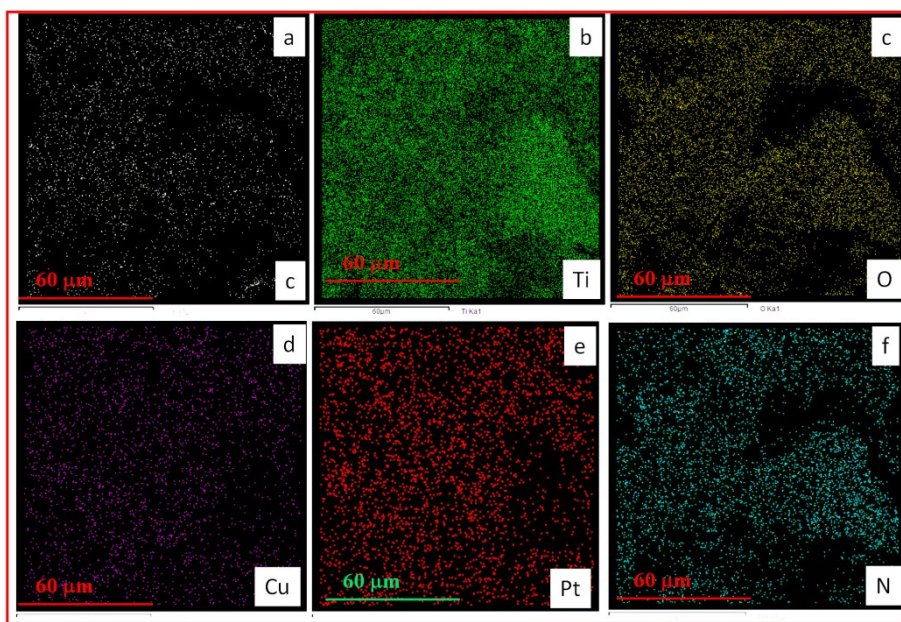

**Fig. 2S (b)** FE-SEM mapping for Pt deposited on TiON-Cu 2 nanorods support.

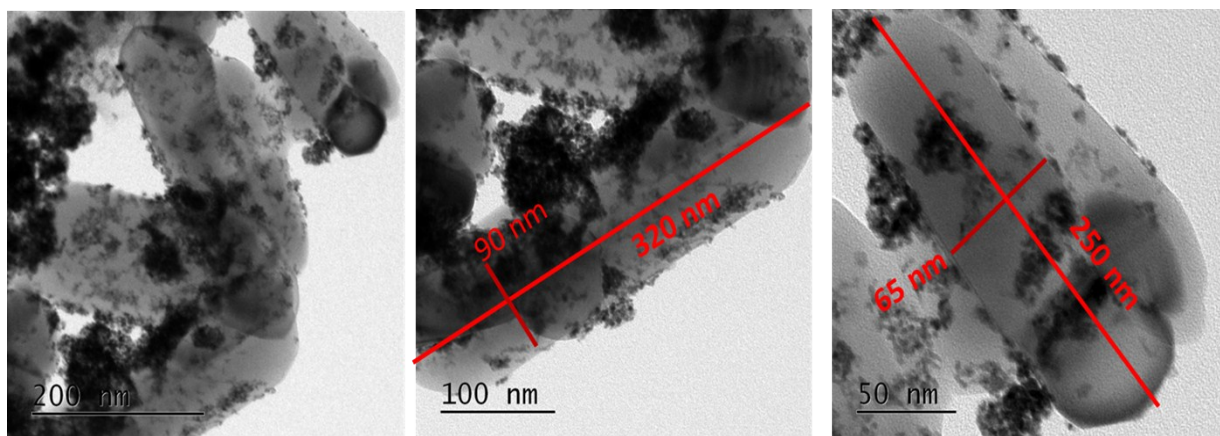

**Fig. 3S (a)** TEM of Pt deposited on TiO<sub>2</sub> nanorods with different scale.

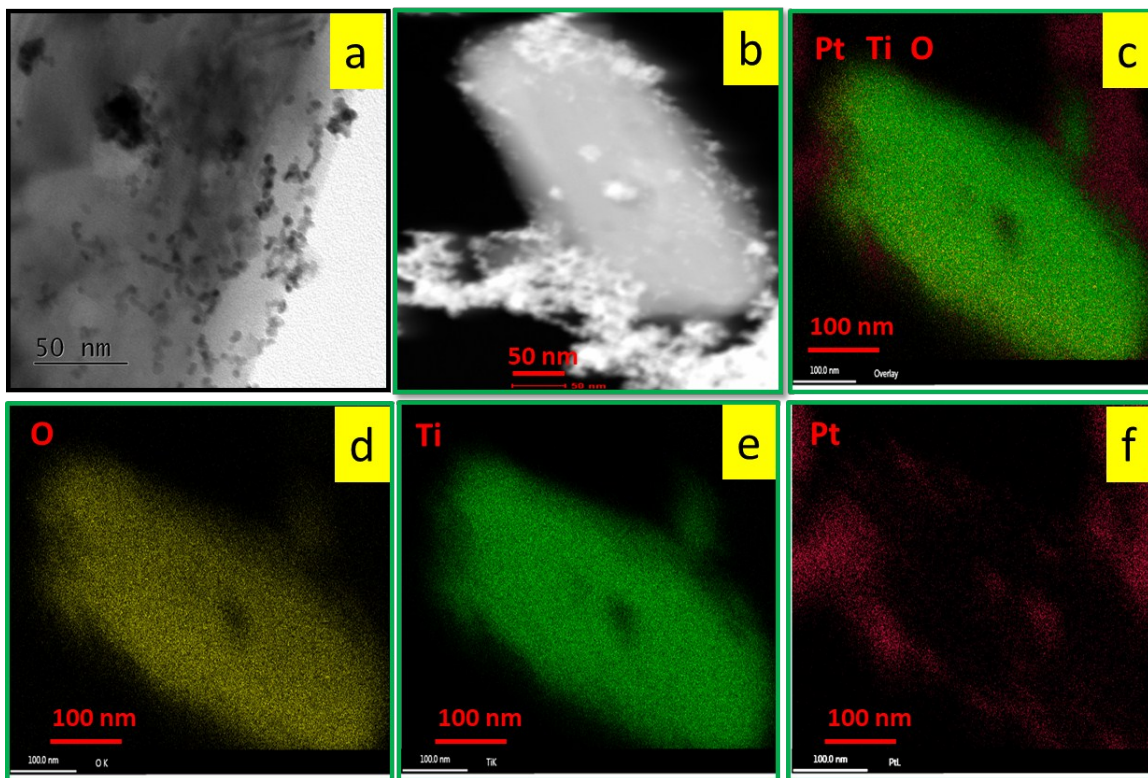

**Fig. 3S (b)** TEM and STEM image of Pt deposited on TiO<sub>2</sub> nanorods. (a & b) Pt/TiO<sub>2</sub>, (c) overall elemental mapping image and individual STEM mapping (d) Oxygen, (e) Titanium and (f) Platinum.

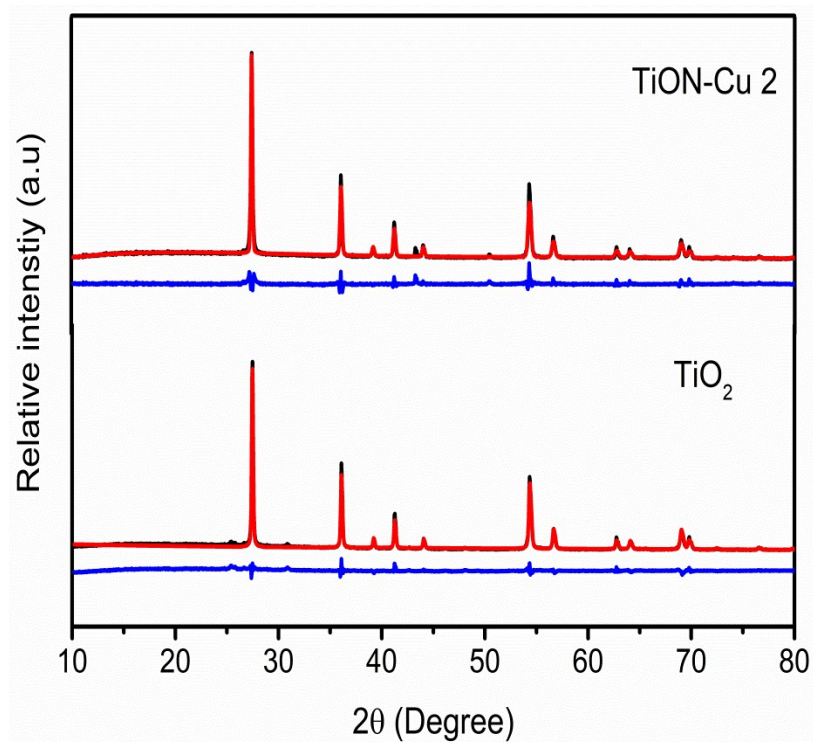

**Fig. 4S (a)** XRD refinement for both  $\text{TiO}_2$  and  $\text{TiON-Cu 2}$  framework.

The refined structural parameters of  $\text{TiO}_2$  and  $\text{TiON-Cu 2}$  sample.

| Parameter              | $\text{TiO}_2$ | $\text{TiON-Cu 2}$ |
|------------------------|----------------|--------------------|
| Space group            | 136            | 136                |
| Hermann-Mauguin symbol | P42/mnm        | P42/mnm            |
| Hall symbol            | -P 4n 2n       | -P 4n 2n           |
| Crystal structure      | Tetragonal     | Tetragonal         |
| a                      | 4.6013         | 4.5946             |
| b                      | 4.6013         | 4.5946             |
| c                      | 2.9587         | 2.9610             |
| $\alpha$               | 90             | 90                 |
| $\beta$                | 90             | 90                 |
| $\gamma$               | 90             | 90                 |
| Volume                 | 62.39          | 62.37              |
| Bragg R-factor         | 3.82           | 3.86               |
| RF-factor              | 3.58           | 3.62               |
| $X^2$                  | 3.16           | 3.26               |

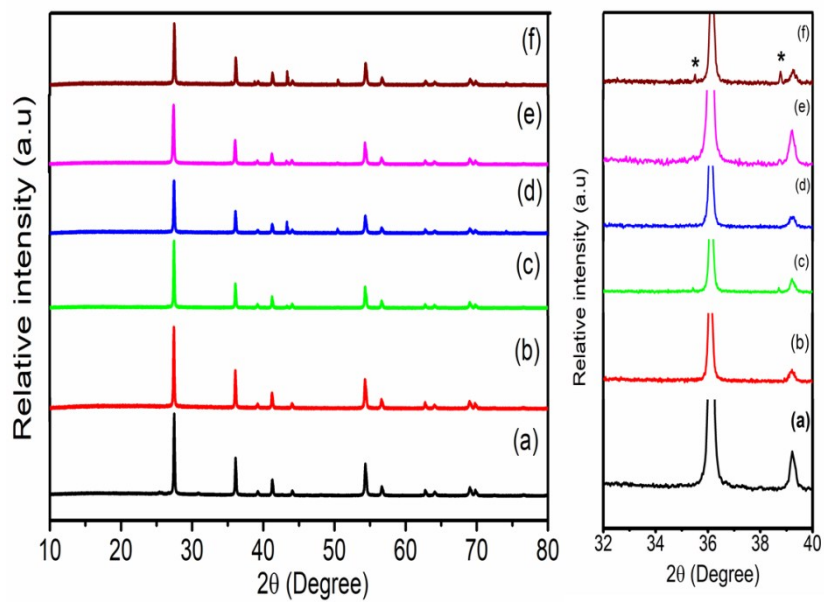

**Fig. 4S (b)** XRD pattern for (a)  $\text{TiO}_2$ , (b)  $\text{TiON}$ , (c)  $\text{TiO}_2\text{-Cu 2}$ , (d)  $\text{TiON-Cu 1}$ , (e)  $\text{TiON-Cu 2}$  and  $\text{TiON-Cu 3}$  framework. Right side expanded region from 32 to 40 ( $2\theta$ ) asterisks peak indicated that un-doped Cu in the form of  $\text{CuO}$  (confirm from JCPDS No:89-5899).



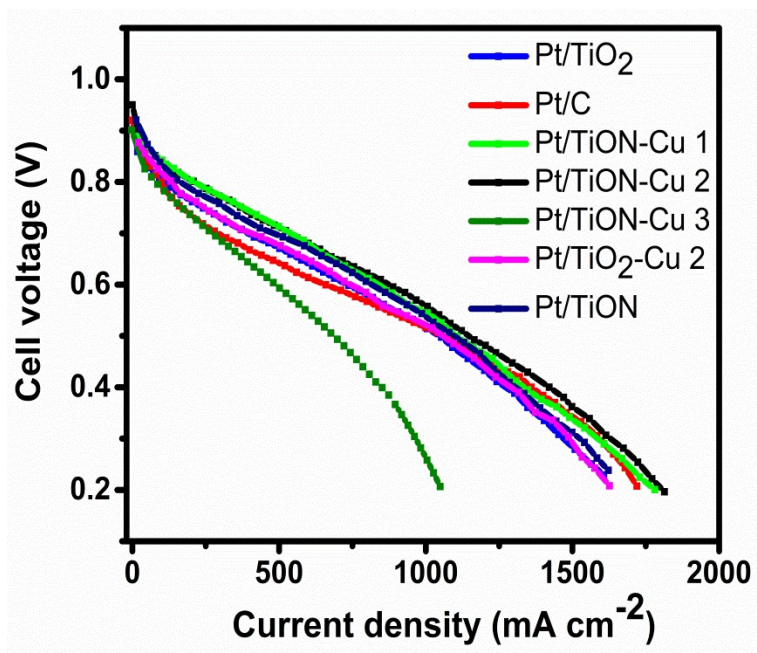

Fig. 5S Steady state polarization of different prepared electrocatalysts.

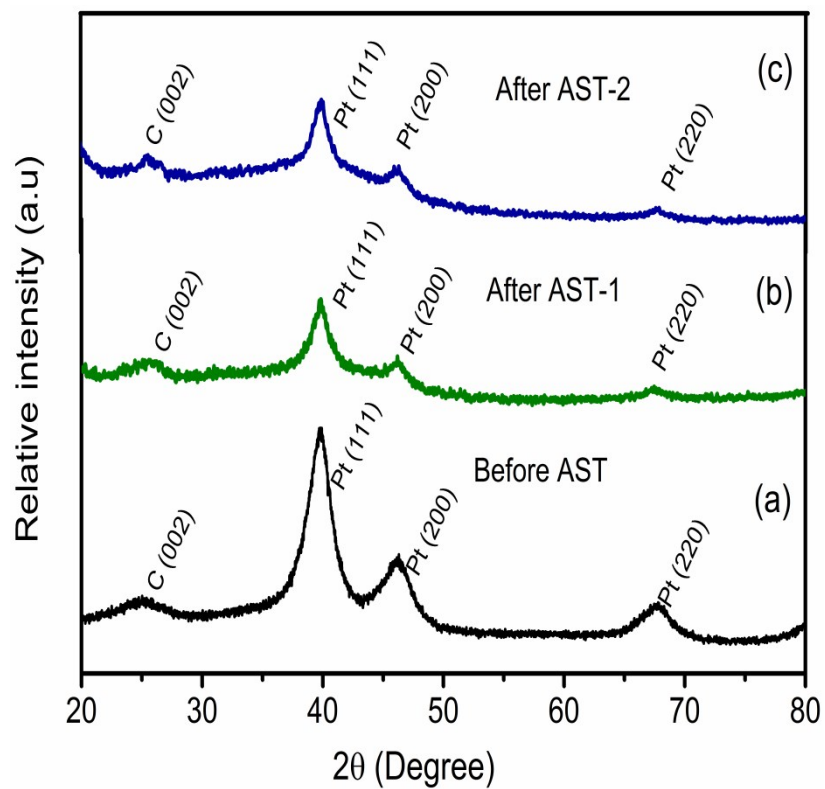

**Fig. 6S** XRD pattern for (a) Pt/C before AST, (b) after AST-1 for support durability and (c) after AST -2 catalyst durability.

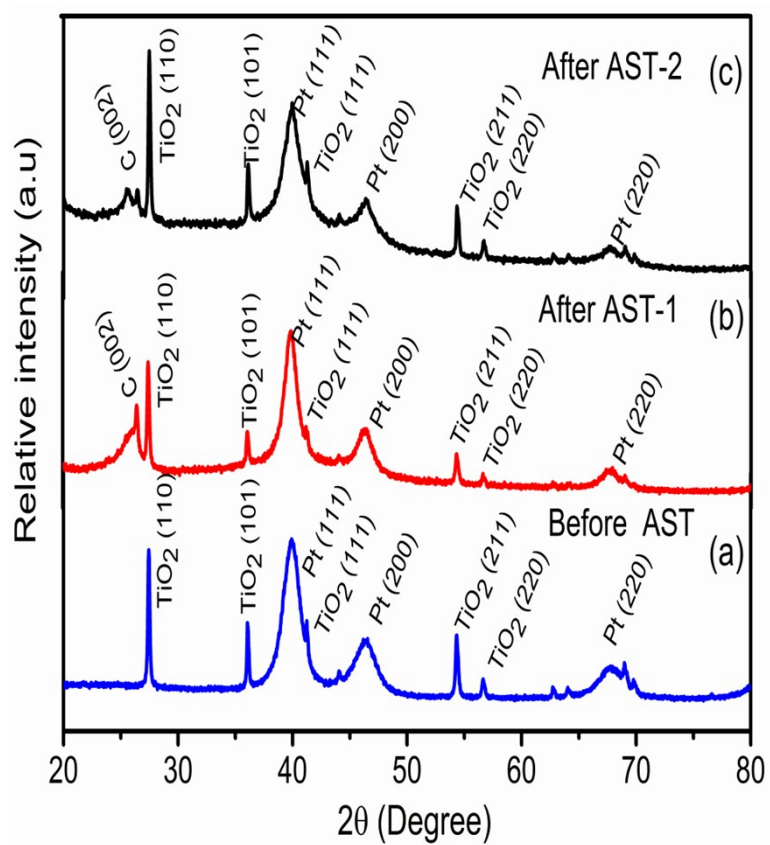

**Fig. 7S** XRD pattern for (a) Before AST for Pt/TiON-Cu 2 nanorods, (b) after AST-1 and (c) after AST-2.

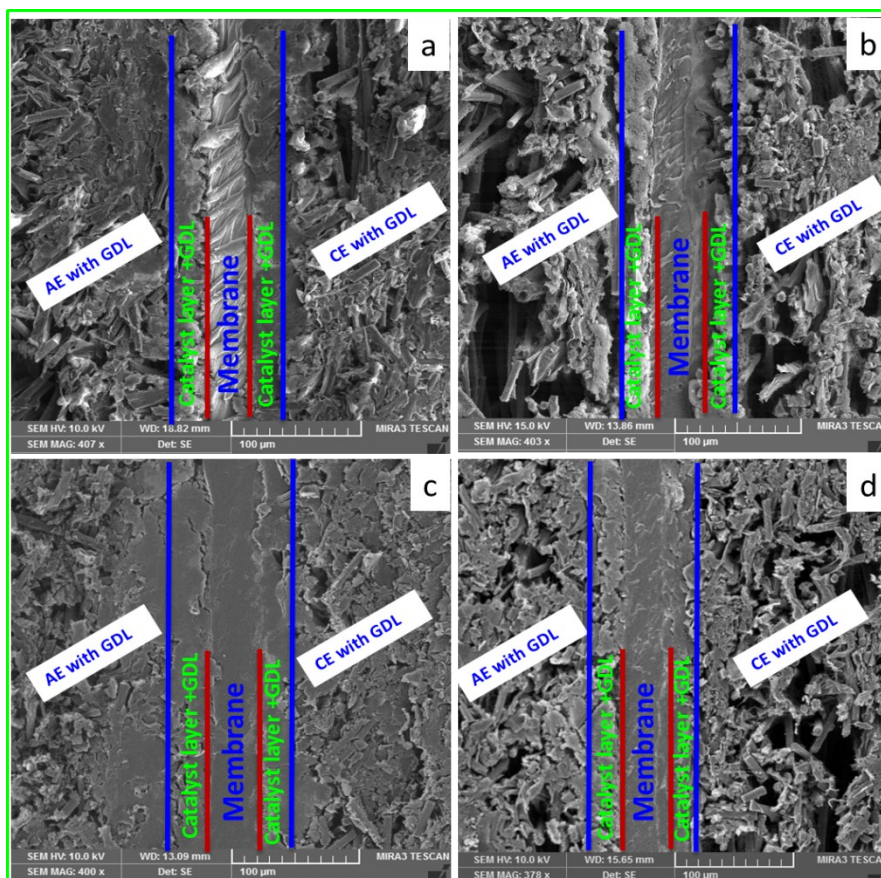

**Fig. 8S** FE-SEM cross sectional image of MEAs comprising Pt/C before and after AST-1 (a & b) and Pt/TiON-Cu 2 nanorods before and after AST-1 (c & d).



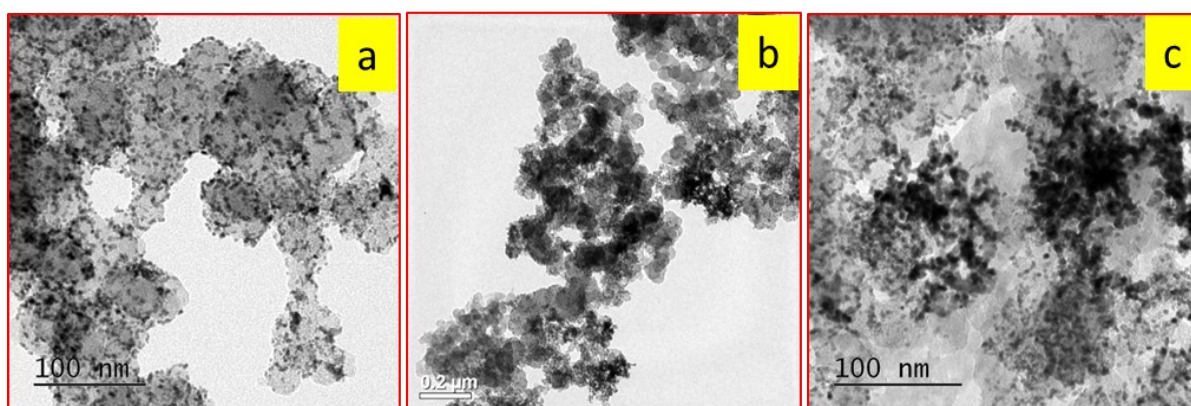

**Fig. 10S** TEM image for (a) Pt/C before AST, (b) after 1,000 AST-1 cycles and (c) after 10,000 AST-2 cycles.

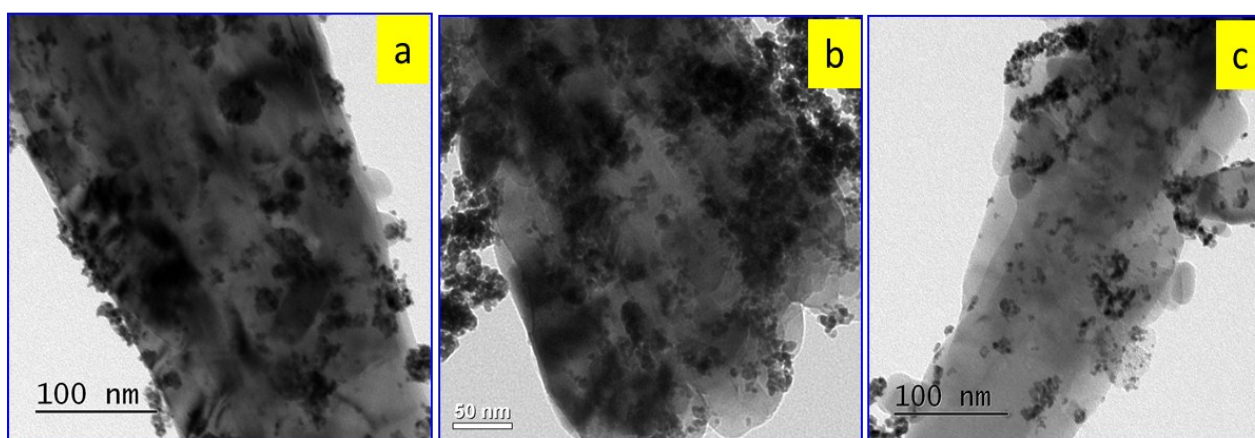

**Fig. 11S** TEM image for Pt/TiON-Cu 2 nanorods (a) Before AST, (b) AST-1 after 6,000 cycles and (c) AST-2 after 18,000 cycles (for catalyst).

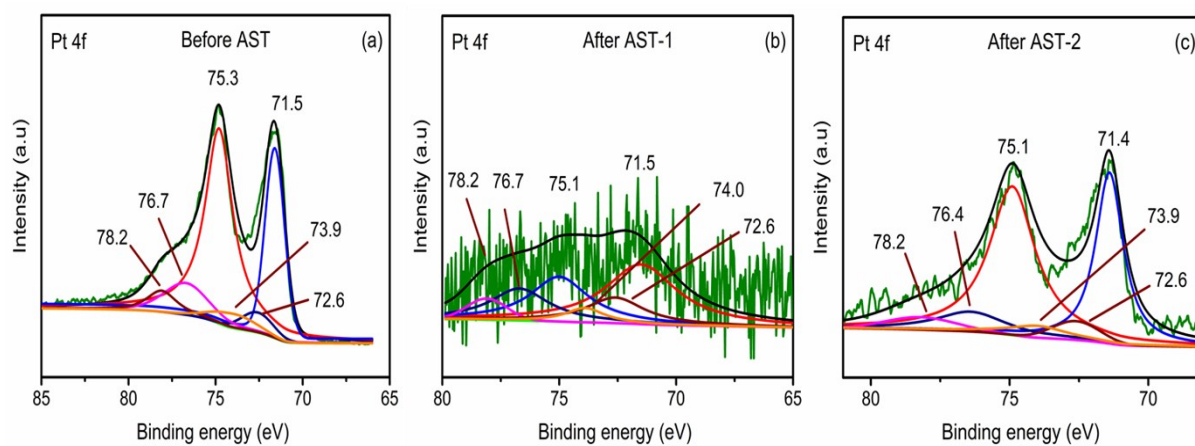

**Fig. 12S** XPS spectra of Pt 4f orbital state for Pt/C: (a) Before AST, (b) AST -1 after 1,000 cycles and (c) AST-2 after 10,000 cycles.



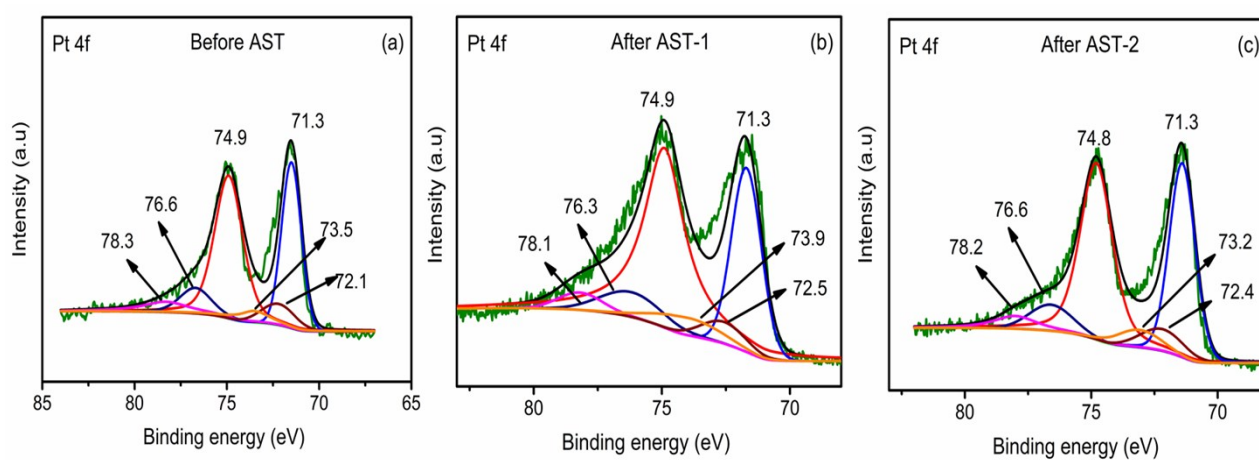

**Fig. 13S** XPS spectra of Pt 4f orbital state for Pt/TiON-Cu 2: (a) before AST (b) AST-1 after 6,000 cycles and (c) AST-2 after 10,000 cycles.
